# Supplementary material
Source: PubMed Central journal article supplement (PMC4948953)
Supplement: NIHMS796577-supplement-Supplemental_Material.pdf [file NIHMS796577-supplement-Supplemental_Material.pdf]

## SUPPLEMENTAL MATERIAL

### Supplemental Table. Results of Multivariable Associative Model to Assess Factors

#### Associated with Renal Contraindicated AHM Use.

|                                              | <b>Adjusted Odds Ratio</b>       | <b>p-value</b> |
|----------------------------------------------|----------------------------------|----------------|
|                                              | <b>(95% Confidence Interval)</b> |                |
| Age (per 10 years)                           | 1.01 (0.99-1.03)                 | 0.326          |
| Female (vs. male)                            | 1.05 (0.81-1.37)                 | 0.710          |
| Race (White vs. other)                       | 1.00 (0.69-1.44)                 | 0.982          |
| Hispanic ethnicity (vs. not)                 | 0.96 (0.58-1.59)                 | 0.884          |
| Medical History                              |                                  |                |
| Chronic kidney disease (Creatinine >2mg/dL)  | 0.83 (0.66-1.06)                 | 0.130          |
| Ischemic heart disease                       | 0.95 (0.77-1.19)                 | 0.679          |
| CVA/TIA                                      | 0.60 (0.45-0.79)                 | <0.001         |
| Atrial fibrillation/flutter                  | 1.30 (1.04-1.62)                 | 0.023          |
| Hyperlipidemia                               | 1.06 (0.84-1.33)                 | 0.650          |
| Hypertension                                 | 1.15 (0.86-1.56)                 | 0.347          |
| Peripheral Vascular Disease                  | 0.70 (0.51-0.95)                 | 0.023          |
| Pulmonary disease                            | 0.86 (0.67-1.11)                 | 0.257          |
| Adult history of smoking                     | 1.68 (1.08-2.63)                 | 0.023          |
| Prior implantable cardioverter defibrillator | 0.79 (0.50-1.25)                 | 0.319          |
| Prior Heart Failure                          | 0.96 (0.79-1.17)                 | 0.677          |
| Anemia                                       | 0.90 (0.70-1.17)                 | 0.448          |

|                                                        |                  |       |
|--------------------------------------------------------|------------------|-------|
| Prior pacemaker                                        | 0.75 (0.51-1.10) | 0.140 |
| Depression                                             | 0.74 (0.52-1.05) | 0.096 |
| Left ventricular systolic dysfunction (EF≤40%)         | 1.32 (1.00-1.74) | 0.053 |
| Exam                                                   |                  |       |
| Systolic Blood Pressure (per 10mmHg at discharge)      | 1.00 (0.99-1.01) | 0.959 |
| Heart Rate (per 10 beats/min at discharge)             | 1.00 (0.99-1.01) | 0.858 |
| Admission Body Mass Index (per 5 units)                | 0.90 (0.81-1.00) | 0.060 |
| Admission Respiratory Rate (per 10 breaths/min)        | 0.99 (0.96-1.01) | 0.337 |
| Labs                                                   |                  |       |
| eGFR admission (per 5 units mL/mg/1.73m <sup>2</sup> ) | 1.09 (0.99-1.20) | 0.068 |
| Hemoglobin (per 1g/dL)                                 | 1.00 (0.97-1.03) | 0.916 |
| Admission Sodium (per 10mmol/L)                        | 1.00 (0.99-1.01) | 0.751 |
| Admission blood urea nitrogen (per 5mg/dL)             | 1.00 (0.98-1.03) | 0.916 |
| Discharge Potassium (per 1mEq/L)                       | 0.90 (0.77-1.06) | 0.200 |
| Length of Stay (per 1 day)                             | 0.97 (0.94-0.99) | 0.019 |
| Hospital Region (vs. South)                            |                  |       |
| Northeast                                              | 1.53 (1.11-2.11) | 0.010 |
| West                                                   | 1.21 (0.79-1.85) | 0.374 |
| Midwest                                                | 1.05 (0.81-1.36) | 0.716 |

|                                  |                  |       |
|----------------------------------|------------------|-------|
| Hospital Rural (vs. Urban)       | 0.92 (0.62-1.38) | 0.698 |
| Hospital bed size (per 500 beds) | 0.87 (0.63-1.20) | 0.400 |
| Teaching Hospital (vs. not)      | 0.94 (0.72-1.23) | 0.646 |

---

CVA/TIA=cerebrovascular accident/transient ischemic attack; eGFR=estimated glomerular filtration rate
